# Supplementary material for: Natural textile based triboelectric nanogenerators for efficient energy harvesting applications
Source: Royal Society of Chemistry journal article supplement (doi:10.1039/d0nr07756a), 2020-12-31
Supplement: d0nr07756a2.pdf [file d0nr07756a2.pdf]

## Supporting Information

### Natural Textile based Triboelectric Nanogenerators for Efficient Energy Harvesting Application

Weradesh Sangkhun<sup>a</sup> and Sompit Wanwong<sup>a\*</sup>

<sup>a</sup>*Program of Materials Technology, School of Energy, Environment and Materials, King Mongkut's University of Technology Thonburi, 126 Pracha Uthit Road, Bang Mod, Thung Khru, Bangkok 10140, Thailand.*

Email: [sompit.wan@kmutt.ac.th](mailto:sompit.wan@kmutt.ac.th)

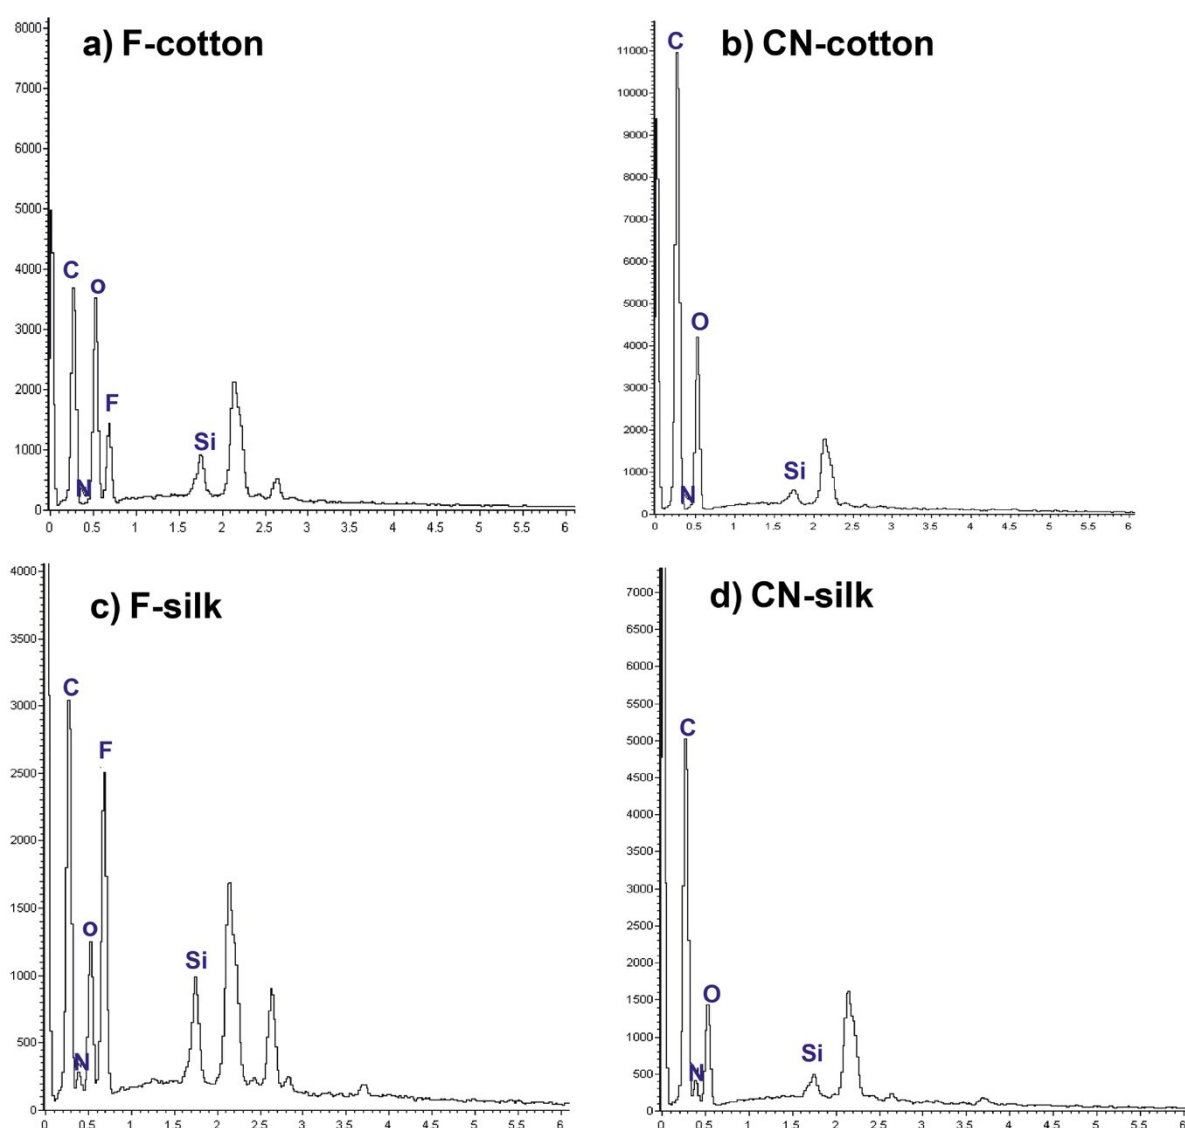

**Figure S1.** EDS spectra of (a) F-cotton, (b) CN-cotton, (c) F-silk and (d) CN-silk.

**Table S1** Element composition of F-cot, F-silk, CN-cot and CN-silk

| Samples | Atomic % |      |      |      |       |
|---------|----------|------|------|------|-------|
|         | F 1s     | O 1s | N 1s | C 1s | Si 2p |
| F-cot   | 62.2     | 6.3  | -    | 25.9 | 5.6   |
| F-silk  | 64.2     | 6.1  | -    | 23.7 | 5.9   |
| CN-cot  | -        | 37.0 | 2.0  | 53.1 | 7.9   |
| CN-silk | -        | 26.0 | 9.1  | 50.9 | 13.9  |

**Effect of adhesive layer selection on output voltage of pristine TENG**

In this work, we aim to facilely attach triboelectric textile with Cu fabric electrode by using conductive ink or glue. To optimize appropriate adhesive materials that offer low-cost production and simple fabrication, we applied three different types of adhesive material on the bottom layer of TENG, which are conductive Ag ink/ carbon ink, fabric glue and fabric glue mixed with graphite powder (20 % wt.), respectively.

Effect of adhesive layer selection on output voltage of pristine Cot-Cot TENG was illustrated in Fig S2. It was found that Cot-Cot TENG using conductive silver ink as adhesive layer between cotton and cu electrode provide very low output voltage. Whereas, Cot-Cot TENG that utilized fabric glue and fabric glue/graphite as adhesive can significantly raise the output voltage up to 25-35 V. This suggested that the enhancement of output voltage of plain textile could be mainly due to chemical component in the commercial fabric adhesive glue (Vibra-Tite) such as cyanoacrylate compound, which create different tribopolarity between the top and bottom layer of cot-cot TENG. In addition, adding graphite particles in fabric glue matrix can enhance interfacial contact and charge extraction ability to the electrode<sup>1, 2</sup>.

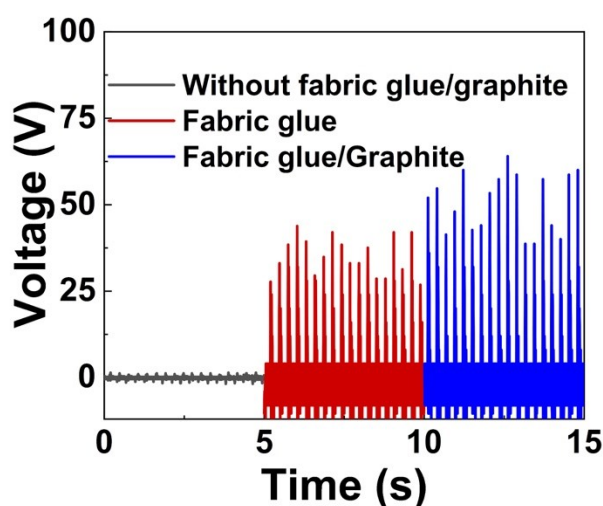**Figure S2** Output voltage of pristine cotton-TENG using different adhesive materials.

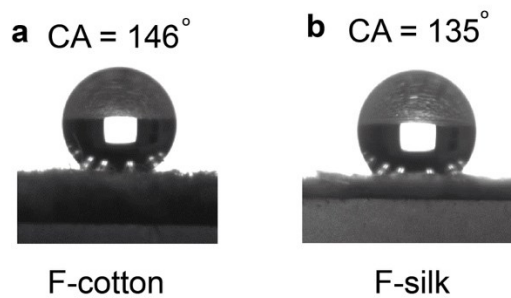

**Figure S3** Water contact angle of (a) F-cotton and (b) F-silk.

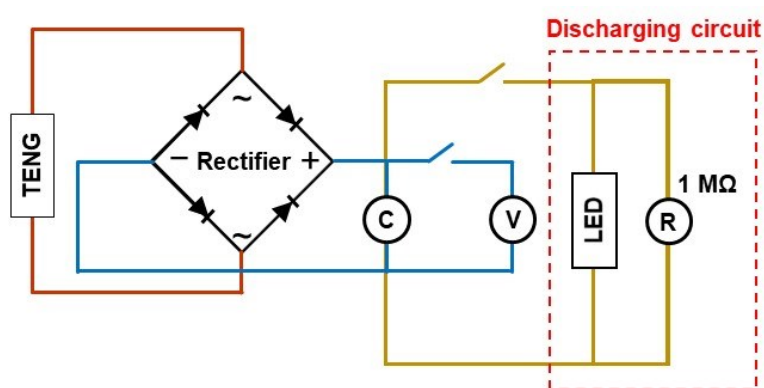

**Figure S4** Circuit diagram of capacitive charging using double stacked N-TENG.

## Reference

1. G. Pace, A. Ansaldo, M. Serri, S. Lauciello and F. Bonaccorso, *Nano Energy*, 2020, **76**, 104989.
2. Y. Liu, W. Liu, Z. L. Wang, W. He, Q. Tang, Y. Xi, X. Wang, H. Guo and C. Hu, *Nature Communications*, 2020, **11**, 1-8.
